# Supplementary material for: Trace-level gravimetric detection promoted by surface interactions of mesoporous materials with chemical vapors
Source: Royal Society of Chemistry journal article supplement (doi:10.1039/c4ta00775a), 2014-01-01
Supplement: c4ta00775a1.pdf [file c4ta00775a1.pdf]

## Supporting Information

# **Trace-Level Gravimetric Detection Promoted by Surface Interactions of Mesoporous Materials with Chemical Vapors**

Tatsuo Kimura\*<sup>a</sup>, Nagy L. Torad<sup>b</sup> and Yusuke Yamauchi\*<sup>bc</sup>

<sup>a</sup> Advanced Manufacturing Research Institute, National Institute of Advanced Industrial Science and Technology (AIST), Shimoshidami, Moriyama-ku, Nagoya 463-8560, Japan.

<sup>b</sup> World Premier International (WPI) Research Center for Materials Nanoarchitectonics (MANA), National Institute for Materials Science (NIMS), Namiki, Tsukuba, Ibaraki 305-0044, Japan.

<sup>c</sup> Precursory Research for Embryonic Science and Technology (PRESTO) Japan Science and Technology Agency (JST), Kawaguchi-shi, Saitama 332-0012, Japan.

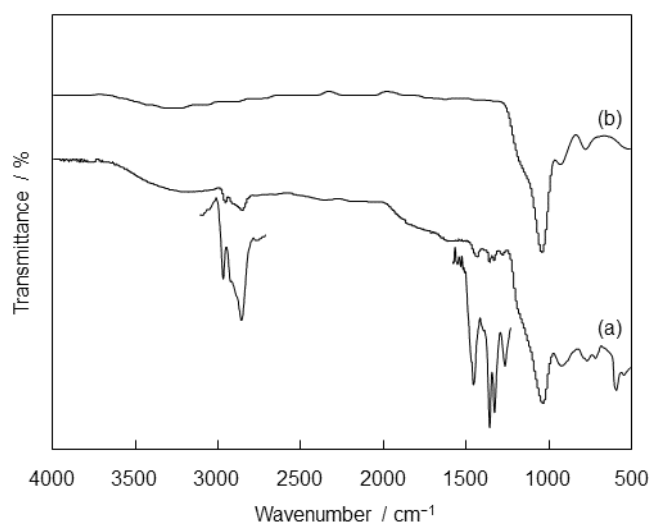

**Fig. S1** FT-IR spectra of drop-coated silica films prepared using Pluronic P123 (a) before and (b) after the UV-ozone treatment.

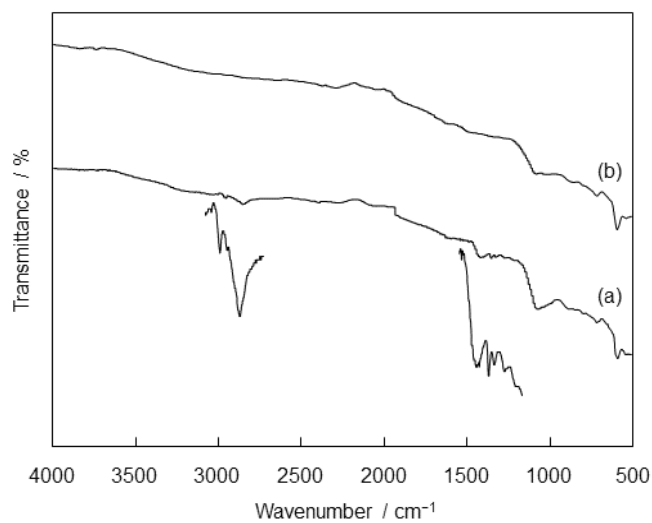

**Fig. S2** FT-IR spectra of drop-coated AlPO films prepared using Pluronic P123 (a) before and (b) after the UV-ozone treatment.

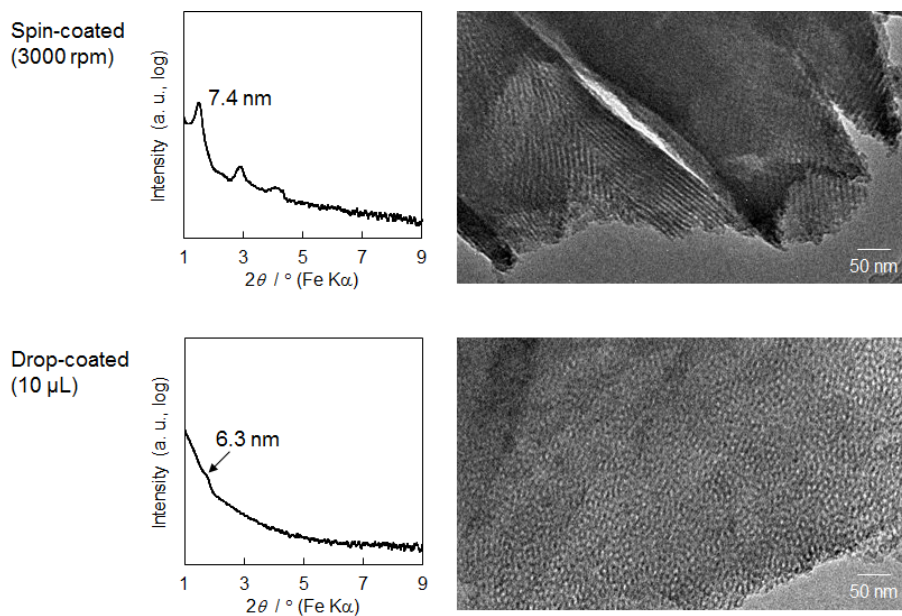

**Fig. S3** XRD pattern and TEM image of spin- and drop-coated and subsequent UV-ozone treated mesoporous silica films prepared using Pluronic P123.

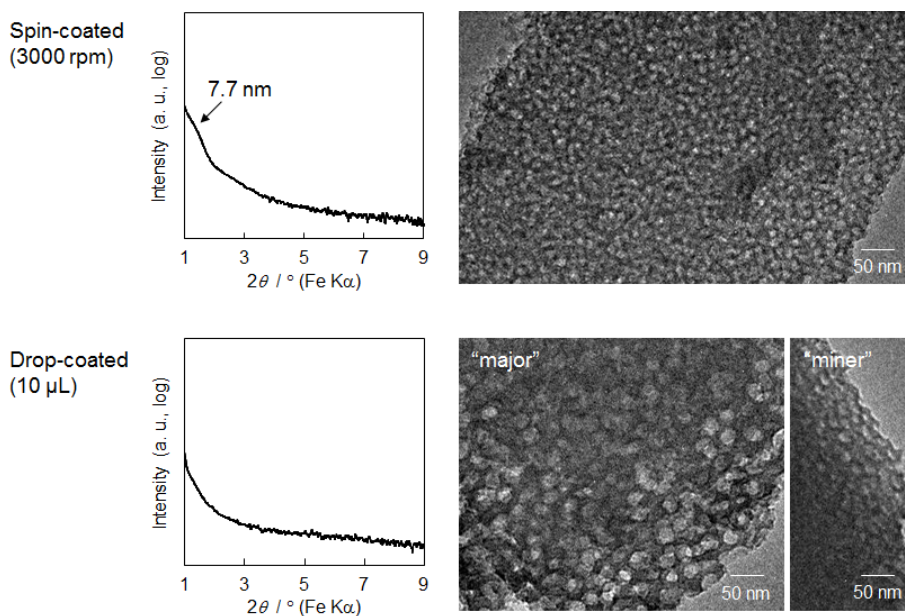

**Fig. S4** XRD pattern and TEM image of spin- and drop-coated and subsequent UV-ozone treated mesoporous AlPO films prepared using Pluronic P123.
